# Supplementary material for: Genome-Wide Association Analysis of Salinity Tolerance-related Loci in Bread Wheat (Triticum aestivum L.) at the Germination Stage
Source: Research Square preprint supplement (doi:10.21203/rs.3.rs-8681970/v1), 2026-02-02
Supplement: Supplementary file 3 [file 5447719cb7f822c1072b0130.xlsx]

## Sheet: Sheet1
	Supplementary Table S5. Gprofiler results of gene ontology enrichment analysis for salt stress associated candidate genes of Ethiopian bread wheat genotypes
Source	Term_name	Term_id	Highlighted	Adjusted_p_value	Negative_log10_of	Term_size	Query_size	Intersection_	Effective_	Intersections
					_adjusted_p_value			size	domain_size
GO:MF	adenine nucleotide transmembrane transporter activity	GO:0000295	TRUE	2.42e-11	10.6158	32	17	5	65196	TRAESCS1A02G246400,
										TRAESCS3D02G199900,
										TRAESCS3B02G262600,
										TRAESCS6D02G166400,
										TRAESCS1D02G364800
GO:MF	purine nucleotide transmembrane transporter activity	GO:0015216	FALSE	2.42e-11	10.6158	32	17	5	65196	TRAESCS1A02G246400,
										TRAESCS3D02G199900,
										TRAESCS3B02G262600,
										TRAESCS6D02G166400,
										TRAESCS1D02G364800
GO:MF	nucleotide transmembrane transporter activity	GO:0015215	FALSE	2.42e-11	10.6158	32	17	5	65196	TRAESCS1A02G246400,
										TRAESCS3D02G199900,
										TRAESCS3B02G262600,
										TRAESCS6D02G166400,
										TRAESCS1D02G364800
GO:MF	CTP synthase activity	GO:0003883	TRUE	8.25e-10	9.08336	15	17	4	65196	TRAESCS1A02G427100,
										TRAESCS3B02G263100,
										TRAESCS3D02G237100,
										TRAESCS1B02G441900
GO:MF	organophosphate ester transmembrane transporter activity	GO:0015605	FALSE	1.8e-09	8.74583	73	17	5	65196	TRAESCS1A02G246400,
										TRAESCS3D02G199900,
										TRAESCS3B02G262600,
										TRAESCS6D02G166400,
										TRAESCS1D02G364800
GO:MF	ADP transmembrane transporter activity	GO:0015217	FALSE	9.02e-09	8.04461	26	17	4	65196	TRAESCS1A02G246400,
										TRAESCS3B02G262600,
										TRAESCS6D02G166400,
										TRAESCS1D02G364800
GO:MF	ATP transmembrane transporter activity	GO:0005347	FALSE	1.06e-08	7.97504	27	17	4	65196	TRAESCS1A02G246400,
										TRAESCS3B02G262600,
										TRAESCS6D02G166400,
										TRAESCS1D02G364800
GO:MF	purine ribonucleotide transmembrane transporter activity	GO:0005346	FALSE	1.06e-08	7.97504	27	17	4	65196	TRAESCS1A02G246400,
										TRAESCS3B02G262600,
										TRAESCS6D02G166400,
										TRAESCS1D02G364800
GO:MF	nucleobase-containing compound transmembrane transporter activity	GO:0015932	FALSE	3.66e-08	7.43604	132	17	5	65196	TRAESCS1A02G246400,
										TRAESCS3D02G199900,
										TRAESCS3B02G262600,
										TRAESCS6D02G166400,
										TRAESCS1D02G364800
GO:MF	organic anion transmembrane transporter activity	GO:0008514	TRUE	5.49e-08	7.26037	143	17	5	65196	TRAESCS2D02G278600,
										TRAESCS1A02G246400,
										TRAESCS3B02G262600,
										TRAESCS6D02G166400,
										TRAESCS1D02G364800
GO:MF	ATP:ADP antiporter activity	GO:0005471	FALSE	4.98e-06	5.30283	23	17	3	65196	TRAESCS3B02G262600,
										TRAESCS6D02G166400,
										TRAESCS1D02G364800
GO:MF	carbohydrate derivative transmembrane transporter activity	GO:1901505	FALSE	7.17e-06	5.14443	132	17	4	65196	TRAESCS1A02G246400,
										TRAESCS3B02G262600,
										TRAESCS6D02G166400,
										TRAESCS1D02G364800
GO:MF	ligase activity, forming carbon-nitrogen bonds	GO:0016879	FALSE	2.08e-05	4.68272	172	17	4	65196	TRAESCS1A02G427100,
										TRAESCS3B02G263100,
										TRAESCS3D02G237100,
										TRAESCS1B02G441900
GO:MF	ligase activity	GO:0016874	FALSE	0.004026	2.39515	650	17	4	65196	TRAESCS1A02G427100,
										TRAESCS3B02G263100,
										TRAESCS3D02G237100,
										TRAESCS1B02G441900
GO:MF	antiporter activity	GO:0015297	FALSE	0.026394	1.5785	392	17	3	65196	TRAESCS3B02G262600,
										TRAESCS6D02G166400,
										TRAESCS1D02G364800
GO:BP	'de novo' CTP biosynthetic process	GO:0044210	TRUE	2.03e-09	8.69156	11	18	4	44474	TRAESCS1A02G427100,
										TRAESCS3B02G263100,
										TRAESCS3D02G237100,
										TRAESCS1B02G441900
GO:BP	CTP metabolic process	GO:0046036	FALSE	4.52e-07	6.34488	38	18	4	44474	TRAESCS1A02G427100,
										TRAESCS3B02G263100,
										TRAESCS3D02G237100,
										TRAESCS1B02G441900
GO:BP	CTP biosynthetic process	GO:0006241	FALSE	4.52e-07	6.34488	38	18	4	44474	TRAESCS1A02G427100,
										TRAESCS3B02G263100,
										TRAESCS3D02G237100,
										TRAESCS1B02G441900
GO:BP	pyrimidine ribonucleoside triphosphate biosynthetic process	GO:0009209	FALSE	4.52e-07	6.34488	38	18	4	44474	TRAESCS1A02G427100,
										TRAESCS3B02G263100,
										TRAESCS3D02G237100,
										TRAESCS1B02G441900
GO:BP	pyrimidine ribonucleoside triphosphate metabolic process	GO:0009208	FALSE	4.52e-07	6.34488	38	18	4	44474	TRAESCS1A02G427100,
										TRAESCS3B02G263100,
										TRAESCS3D02G237100,
										TRAESCS1B02G441900
GO:BP	pyrimidine nucleoside triphosphate biosynthetic process	GO:0009148	FALSE	4.52e-07	6.34488	38	18	4	44474	TRAESCS1A02G427100,
										TRAESCS3B02G263100,
										TRAESCS3D02G237100,
										TRAESCS1B02G441900
GO:BP	nucleotide transport	GO:0006862	TRUE	5.59e-07	6.25235	40	18	4	44474	TRAESCS3D02G199900,
										TRAESCS3B02G262600,
										TRAESCS6D02G166400,
										TRAESCS1D02G364800
GO:BP	pyrimidine ribonucleotide biosynthetic process	GO:0009220	FALSE	1.29e-06	5.88815	49	18	4	44474	TRAESCS1A02G427100,
										TRAESCS3B02G263100,
										TRAESCS3D02G237100,
										TRAESCS1B02G441900
GO:BP	pyrimidine ribonucleotide metabolic process	GO:0009218	FALSE	1.29e-06	5.88815	49	18	4	44474	TRAESCS1A02G427100,
										TRAESCS3B02G263100,
										TRAESCS3D02G237100,
										TRAESCS1B02G441900
GO:BP	pyrimidine nucleoside triphosphate metabolic process	GO:0009147	FALSE	3.18e-06	5.49799	61	18	4	44474	TRAESCS1A02G427100,
										TRAESCS3B02G263100,
										TRAESCS3D02G237100,
										TRAESCS1B02G441900
GO:BP	glutamine metabolic process	GO:0006541	TRUE	6.61e-06	5.18006	73	18	4	44474	TRAESCS1A02G427100,
										TRAESCS3B02G263100,
										TRAESCS3D02G237100,
										TRAESCS1B02G441900
GO:BP	pyrimidine nucleotide biosynthetic process	GO:0006221	FALSE	2.09e-05	4.6798	97	18	4	44474	TRAESCS1A02G427100,
										TRAESCS3B02G263100,
										TRAESCS3D02G237100,
										TRAESCS1B02G441900
GO:BP	pyrimidine nucleotide metabolic process	GO:0006220	FALSE	2.18e-05	4.66181	98	18	4	44474	TRAESCS1A02G427100,
										TRAESCS3B02G263100,
										TRAESCS3D02G237100,
										TRAESCS1B02G441900
GO:BP	organophosphate ester transport	GO:0015748	FALSE	5.81e-05	4.23616	125	18	4	44474	TRAESCS3D02G199900,
										TRAESCS3B02G262600,
										TRAESCS6D02G166400,
										TRAESCS1D02G364800
GO:BP	pyrimidine-containing compound biosynthetic process	GO:0072528	FALSE	8.64e-05	4.06371	138	18	4	44474	TRAESCS1A02G427100,
										TRAESCS3B02G263100,
										TRAESCS3D02G237100,
										TRAESCS1B02G441900
GO:BP	pyrimidine-containing compound metabolic process	GO:0072527	FALSE	0.000105	3.9776	145	18	4	44474	TRAESCS1A02G427100,
										TRAESCS3B02G263100,
										TRAESCS3D02G237100,
										TRAESCS1B02G441900
GO:BP	glutamine family amino acid metabolic process	GO:0009064	FALSE	0.000156	3.80652	160	18	4	44474	TRAESCS1A02G427100,
										TRAESCS3B02G263100,
										TRAESCS3D02G237100,
										TRAESCS1B02G441900
GO:BP	nucleobase-containing compound transport	GO:0015931	FALSE	0.000164	3.78496	162	18	4	44474	TRAESCS3D02G199900,
										TRAESCS3B02G262600,
										TRAESCS6D02G166400,
										TRAESCS1D02G364800
GO:BP	nucleoside triphosphate biosynthetic process	GO:0009142	FALSE	0.000674	3.17126	231	18	4	44474	TRAESCS1A02G427100,
										TRAESCS3B02G263100,
										TRAESCS3D02G237100,
										TRAESCS1B02G441900
GO:BP	ribonucleoside triphosphate biosynthetic process	GO:0009201	FALSE	0.000674	3.17126	231	18	4	44474	TRAESCS1A02G427100,
										TRAESCS3B02G263100,
										TRAESCS3D02G237100,
										TRAESCS1B02G441900
GO:BP	ribonucleotide biosynthetic process	GO:0009260	FALSE	0.001998	2.69949	304	18	4	44474	TRAESCS1A02G427100,
										TRAESCS3B02G263100,
										TRAESCS3D02G237100,
										TRAESCS1B02G441900
GO:BP	ribose phosphate biosynthetic process	GO:0046390	FALSE	0.002076	2.68267	307	18	4	44474	TRAESCS1A02G427100,
										TRAESCS3B02G263100,
										TRAESCS3D02G237100,
										TRAESCS1B02G441900
GO:BP	nitrogen compound transport	GO:0071705	FALSE	0.005534	2.25693	1467	18	6	44474	TRAESCS2D02G278600,
										TRAESCS3D02G199900,
										TRAESCS6A02G150800,
										TRAESCS3B02G262600,
										TRAESCS6D02G166400,
										TRAESCS1D02G364800
GO:BP	nucleotide biosynthetic process	GO:0009165	FALSE	0.007107	2.14833	420	18	4	44474	TRAESCS1A02G427100,
										TRAESCS3B02G263100,
										TRAESCS3D02G237100,
										TRAESCS1B02G441900
GO:BP	ribonucleoside triphosphate metabolic process	GO:0009199	FALSE	0.007307	2.13625	423	18	4	44474	TRAESCS1A02G427100,
										TRAESCS3B02G263100,
										TRAESCS3D02G237100,
										TRAESCS1B02G441900
GO:BP	nucleoside triphosphate metabolic process	GO:0009141	FALSE	0.009713	2.01264	455	18	4	44474	TRAESCS1A02G427100,
										TRAESCS3B02G263100,
										TRAESCS3D02G237100,
										TRAESCS1B02G441900
GO:BP	ribonucleotide metabolic process	GO:0009259	FALSE	0.015726	1.80338	515	18	4	44474	TRAESCS1A02G427100,
										TRAESCS3B02G263100,
										TRAESCS3D02G237100,
										TRAESCS1B02G441900
GO:BP	ribose phosphate metabolic process	GO:0019693	FALSE	0.016085	1.79359	518	18	4	44474	TRAESCS1A02G427100,
										TRAESCS3B02G263100,
										TRAESCS3D02G237100,
										TRAESCS1B02G441900
GO:BP	nucleoside phosphate biosynthetic process	GO:1901293	FALSE	0.01863	1.72978	538	18	4	44474	TRAESCS1A02G427100,
										TRAESCS3B02G263100,
										TRAESCS3D02G237100,
										TRAESCS1B02G441900
GO:BP	L-amino acid metabolic process	GO:0170033	FALSE	0.022519	1.64745	565	18	4	44474	TRAESCS1A02G427100,
										TRAESCS3B02G263100,
										TRAESCS3D02G237100,
										TRAESCS1B02G441900
GO:BP	proteinogenic amino acid metabolic process	GO:0170039	FALSE	0.023458	1.62971	571	18	4	44474	TRAESCS1A02G427100,
										TRAESCS3B02G263100,
										TRAESCS3D02G237100,
										TRAESCS1B02G441900
GO:BP	alpha-amino acid metabolic process	GO:1901605	FALSE	0.031046	1.50799	614	18	4	44474	TRAESCS1A02G427100,
										TRAESCS3B02G263100,
										TRAESCS3D02G237100,
										TRAESCS1B02G441900
	Legend: GO:MF=Gene ontology molecular function
	GO:BP= Gene ontology biological process
