# Supplementary material for: Genome-Wide Association Analysis of Salinity Tolerance-related Loci in Bread Wheat (Triticum aestivum L.) at the Germination Stage
Source: Research Square preprint supplement (doi:10.21203/rs.3.rs-8681970/v1), 2026-02-02
Supplement: Supplementary file 5 [file 8b4696442a8e90f6bf42a664.xlsx]

## Sheet: Sheet1
Supplementary Table S4. QTN and SNP marker annotation of GWAS results
SNP	Chr	Pos	P values	GeneIDs	Descriptions
100631705|F|0-66:C>T-66:C>T	chr4B	169000000	3.16e-05	TraesCS4B01G129100;TraesCS4B01G129200	Myb factor; Cell division control protein 45-like protein
100668146|F|0-23:T>A-23:T>A	chr3D	576000000	7.95e-12	TraesCS3D01G473700;TraesCS3D01G473800;	NBS-LRR-like resistance protein; Disease resistance protein (TIR-NBS-LRR class) family; Disease resistance protein RPM1; Disease resistance protein RPP13
				TraesCS3D01G473900;TraesCS3D01G474000;
				TraesCS3D01G474100;TraesCS3D01G474200;
1068077|F|0-5:C>T-5:C>T	chr6B	113000000	4.21e-05	TraesCS6B01G118000;TraesCS6B01G118100	Pectin lyase-like superfamily protein; SBP (S-ribonuclease binding protein) family protein
1088721|F|0-68:C>G-68:C>G	chr7D	29405350	6.63e-12	TraesCS7D01G054800	Beta-fructofuranosidase 1
1089970|F|0-5:A>C-5:A>C	chr1B	395000000	3.71e-06	TraesCS1B01G217800;TraesCS1B01G217900;	DDB1-and CUL4-associated factor; Hippocampus abundant transcript 1 protein; F-box family protein; F-box domain containing protein
				TraesCS1B01G218000;TraesCS1B01G218100;
1091234|F|0-52:G>T-52:G>T	chr6A	588000000	2.52e-07	TraesCS6A01G356600;TraesCS6A01G356700;	Anthocyanin 5-aromatic acyltransferase-like protein; NBS-LRR disease resistance protein, putative; Disease resistance protein RPP13; Disease resistance protein (NBS-LRR class) family
				TraesCS6A01G356800;TraesCS6A01G356900
1103256|F|0-8:T>C-8:T>C	chr6B	516000000	2.21e-12	TraesCS6B01G286400	MADS box transcription factor
1104630|F|0-7:G>T-7:G>T	chr2D	502000000	1.54e-13	TraesCS2D01G393200	GRAS transcription factor
1123331|F|0-67:G>C-67:G>C	chr7A	178000000	4.26e-08	TraesCS7A01G214200;TraesCS7A01G214300	DNA repair protein complementing XP-C cells-like protein; Receptor kinase
1128907|F|0-36:T>C-36:T>C	chr6A	600000000	2.04e-08	TraesCS6A01G378700;TraesCS6A01G378800;	Eukaryotic translation initiation factor 3 subunit A; Cytochrome P450; Receptor kinase 2
				TraesCS6A01G378900
1151109|F|0-40:C>T-40:C>T	chr3A	19493984	3.32e-10	TraesCS3A01G034500;TraesCS3A01G034600;	Heat shock protein; Protein kinase family protein; Kinase family protein; kinase-like protein; Receptor-like kinase; Kinase, putative; Short-chain dehydrogenase/reductase
				TraesCS3A01G034700;TraesCS3A01G034800;
				TraesCS3A01G034900;TraesCS3A01G035000;
1165296|F|0-17:A>G-17:A>G	chr4B	553000000	1.13e-06	TraesCS4B01G274700	3-ketoacyl-CoA synthase
1202682|F|0-45:C>T-45:C>T	chr3A	164000000	9.32e-08	TraesCS3A01G161600	Zinc finger CCCH domain-containing protein 4
1206801|F|0-39:A>G-39:A>G	chr6B	107000000	2.9e-05	TraesCS6B01G117300	Response to low sulfur protein, putative
1235018|F|0-26:A>G-26:A>G	chr7D	5017276	4.38e-06	TraesCS7D01G010400;TraesCS7D01G010500;	transmembrane protein, putative (DUF594); ATP-dependent RNA helicase family protein; Protein yippee-like; NBS-LRR disease resistance protein-like protein; Receptor-like kinase; Leucine-rich repeat receptor-like protein kinase family protein; Transposon protein, putative, CACTA, En/Spm sub-class
				TraesCS7D01G010600;TraesCS7D01G010700;
				TraesCS7D01G010800;TraesCS7D01G010900;
				TraesCS7D01G011000;
1259295|F|0-45:T>C-45:T>C	chr2B	656000000	1.76e-13	TraesCS2B01G461900	Ubiquitin-conjugating enzyme E2
1342349|F|0-66:A>G-66:A>G	chrUn	390000000	6.02e-06	TraesCSU01G253600	Pollen allergen Phl p 5
1698122|F|0-62:G>C-62:G>C	chr3D	501000000	5.43e-13	TraesCS3D01G385800;TraesCS3D01G385900	alpha/beta-Hydrolases superfamily protein; Heat shock transcription factor
3029013|F|0-19:G>A-19:G>A	chr7A	212000000	3.2e-14	TraesCS7A01G238700;TraesCS7A01G238800;	ATP-dependent RNA helicase; GRF zinc finger family protein, expressed; Pyruvate dehydrogenase E1 component subunit alpha
				TraesCS7A01G238900
4261552|F|0-31:G>A-31:G>A	chr2B	551000000	1.53e-07	TraesCS2B01G387300	MYB transcription factor
979220|F|0-19:A>G-19:A>G	chr4B	482000000	4.32e-06	TraesCS4B01G230400;TraesCS4B01G230500;	Protein FAR1-RELATED SEQUENCE 5; Microtubule associated protein family protein, putative, expressed; Protein Hikeshi
				TraesCS4B01G230600
997544|F|0-65:A>C-65:A>C	chr4B	228000000	4.08e-12	TraesCS4B01G150000	Sodium/calcium exchanger 2
998195|F|0-42:C>G-42:C>G	chr5B	696000000	0.000183	TraesCS5B01G541200;TraesCS5B01G541300;	Disease resistance protein RPM1; carboxyl-terminal peptidase, putative (DUF239); Protein transport protein Sec61 subunit alpha
				TraesCS5B01G541400;TraesCS5B01G541500;
				TraesCS5B01G541600;TraesCS5B01G541700
999766|F|0-46:C>T-46:C>T	chr3B	720000000	3.08e-05	TraesCS3B01G471700;TraesCS3B01G471800;	Metacaspase-1; Disease resistance family protein; Glutathione S-transferase; Fatty acid oxidation complex subunit alpha
				TraesCS3B01G471900;TraesCS3B01G472000
	Legend: SNP =single nucleotide polymorphism		,CHR,chromosome.Pos,position of the sNP
