# Supplementary material for: Genome-Wide Association Analysis of Salinity Tolerance-related Loci in Bread Wheat (Triticum aestivum L.) at the Germination Stage
Source: Research Square preprint supplement (doi:10.21203/rs.3.rs-8681970/v1), 2026-02-02
Supplement: Supplementary file 6 [file d03f2f7b717612ca2d82ebc4.xlsx]

## Sheet: Sheet1
	Supplimentary Table S1.List of Bread wheat genotypes used for GWAS analysis of salt tolerance
GenotypeID	Pedigree	Code	IGSS CODE	Name
KUBW001	INQALAB 91*2/TUKURU//T.SPELTA PI348599/3/2*INQALAB 91*2/KUKUNA/4/2*KINGBIRD #1//INQALAB 91*2/TUKURU	THBW1	Genotype 1	ETBW1
KUBW011	TRCH/SRTU//KACHU*2/3/KINGBIRD #1	THBW11	Genotype 2	ETBW11
KUBW014	MILAN//PRL/2*PASTOR/4/CROC_1/AE.SQUARROSA (213)//PGO/3/BAV92/5/PAURAQ	THBW14	Genotype 3	ETBW14
KUBW015	FRANCOLIN #1/BAJ #1	THBW15	Genotype 4	ETBW15
KUBW018	W15.92/4/PASTOR//HXL7573/2*BAU/3/WBLL1*2/5/WHEAR/SOKOLL	THBW18	Genotype 5	ETBW18
KUBW020	KSW/SAUAL//SAUAL/3/REEDLING #1= KASUKO	THBW20	Genotype 6	ETBW20
KUBW035	TURACO/CHIL/6/SERI 82/5/ALD'S'/4/BB/GLL//CNO67/7C/3/KVZ/TI	THBW35	Genotype 7	ETBW35
KUBW037	MINO/898.97/4/PFAU/SERI.1B//AMAD/3/KRONSTAD F2004	THBW37	Genotype 8	ETBW37
KUBW042	MUTUS*2/AKURI//MUTUS*2/TECUE #1	THBW42	Genotype 9	ETBW42
KUBW051	SOKOLL/3/PASTOR//HXL7573/2*BAU/4/PARUS/PASTOR	THBW51	Genotype 10	ETBW51
KUBW052	SOKOLL/WBLL1/4/D67.2/PARANA 66.270//AE.SQUARROSA (320)/3/CUNNINGHAM	THBW52	Genotype 11	ETBW52
KUBW057	KISKADEE #1/5/KAUZ*2/MNV//KAUZ/3/MILAN/4/BAV92/6/WHEAR//2*PRL/2*PASTOR	THBW57	Genotype 12	ETBW57
KUBW058	CHWINK/GRACKLE #1//FRNCLN	THBW58	Genotype 13	ETBW58
KUBW059	MINO/898.97/4/2*PFAU/SERI.1B//AMAD/3/KRONSTAD F2004	THBW59	Genotype 14	ETBW59
KUBW060	ATTILA/3/URES/PRL//BAV92/4/WBLL1/5/CHYAK1/6/NAVJ07	THBW60	Genotype 15	ETBW60
KUBW061	BABAX/LR42//BABAX/3/ER2000/4/BAVIS	THBW61	Genotype 16	ETBW61
KUBW062	PFAU/MILAN/3/BABAX/LR42//BABAX/8/JUP/ZP//COC/3/PVN/4/TNMU/5/TNMU/6/SITE/7/TNMU	THBW62	Genotype 17	ETBW62
KUBW063	PRL/2*PASTOR//WAXWING*2/KRONSTAD F2004/4/PBW343*2/KUKUNA//KRONSTAD F2004/3/PBW343*2/KUKUNA	THBW63	Genotype 18	ETBW63
KUBW066	ROLF07/YANAC//TACUPETO F2001/BRAMBLING*2/3/WHEAR//2*PRL/2*PASTOR	THBW66	Genotype 19	ETBW66
KUBW067	THELIN/3/BABAX/LR42//BABAX/4/BABAX/LR42//BABAX*2/5/KIRITATI/2*TRCH	THBW67	Genotype 20	ETBW67
KUBW071	THELIN/WAXWING//ATTILA*2/PASTOR/3/INQALAB91*2/TUKURU 9Y-0B	THBW71	Genotype 21	ETBW71
KUBW072	PASTOR//HXL7573/2*BAU/3/SOKOLL/WBLL1/4/SAFI-1//NS732/HER/3/SAADA	THBW72	Genotype 22	ETBW72
KUBW074	PASTOR//HXL7573/2*BAU/3/SOKOLL/WBLL1/4/SAFI-1//NS732/HER/3/SAADA	THBW74	Genotype 23	ETBW74
KUBW079	CHEN/AEGILOPS SQUARROSA (TAUS)//BCN/3/VEE#7/BOW/4/PASTOR/5/HUBARA-1	THBW79	Genotype 24	ETBW79
KUBW082	PRL/2*PASTOR*2//FH6-1-7*2/3/PBW343*2/KUKUNA*2//FRTL/PIFED	THBW82	Genotype 25	ETBW82
KUBW084	MEX94.27.1.20/3/SOKOLL//ATTILA/3*BCN/5/W15.92/4/PASTOR//HXL7573/2*BAU/3/WBLL1	THBW84	Genotype 26	ETBW84
KUBW086	NGL//2*WHEAR/SOKOLL	THBW86	Genotype 27	ETBW86
KUBW087	SERI.1B//KAUZ/HEVO/3/AMAD*2/4/KIRITATI*2/6/BAV92//IRENA/KAUZ/3/HUITES/4/T.SPELTA PI348764/5/BAV92//IRENA/KAUZ/3/HUITES	THBW87	Genotype 28	ETBW87
KUBW092	SUP152//PUB94.15.1.12/WBLL1	THBW92	Genotype 29	ETBW92
KUBW094	WBLL1/KUKUNA//TACUPETO F2001/6/PVN//CAR422/ANA/5/BOW/CROW//BUC/PVN/3/YR/4/TRAP#1/7/CNO79//PF70354/MUS/3/PASTOR/4/BAV92*2/5/FH6-1-7	THBW94	Genotype 30	ETBW94
KUBW096	KACHU #1/6/NG8201/KAUZ/4/SHA7//PRL/VEE#6/3/FASAN/5/MILAN/KAUZ/7/KACHU/8/KZA//WH 542/2*PASTOR/3/BACEU #1/9/KACHU #1/KIRITATI//KACHU	THBW96	Genotype 31	ETBW96
KUBW099	KFA/2*KACHU/3/KINGBIRD #1//INQALAB 91*2/TUKURU/4/KFA/2*KACHU	THBW99	Genotype 32	ETBW99
KUBW104	ELVIRA/5/CNDO/R143//ENTE/MEXI75/3/AE.SQ/4/2*OCI/6/VEE/PJN//KAUZ/3/PASTOR/7/TILHI/4/CROC_1/AE.SQUARROSA (213)//PGO/3/CMH81.38/2*KAUZ/8/PICAFLOR #2	THBW104		ETBW104
KUBW107	KA/NAC//TRCH/5/W15.92/4/PASTOR//HXL7573/2*BAU/3/WBLL1	THBW107	Genotype 34	ETBW107
KUBW108	PRL/2*PASTOR/6/TRAP#1/BOW/3/VEE/PJN//2*TUI/4/BAV92/RAYON/5/KACHU #1	THBW108	Genotype 35	ETBW108
KUBW109	FALCIN/AE.SQUARROSA (312)/3/THB/CEP7780//SHA4/LIRA/4/FRET2/5/DANPHE #1/11/CROC_1/AE.SQUARROSA (213)//PGO/10/ATTILA*2/9/KT/BAGE//FN/U/3/BZA/4/TRM/5/ALDAN/6/SERI/7/VEE#10/8/OPATA	THBW109	Genotype 36	ETBW109
KUBW110	SHORTENED SR26 TRANSLOCATION//2*WBLL1*2/KKTS/3/BECARD	THBW110	Genotype 37	ETBW110
KUBW113	ND643/2*WBLL1//KACHU	THBW113	Genotype 38	ETBW113
KUBW114	BOUSHODA-1/4/CROC-1/AE.SQUARROSA (205)//KAUZ/3/SASIA	THBW114	Genotype 39	ETBW114
KUBW116	KFA//PBW343/PASTOR/3/PBW343*2/KUKUNA/4/PBW343*2/KUKUNA*2//FRTL/PIFED/5/PBW343*2/KUKUNA*2//FRTL/PIFED	THBW116	Genotype 40	ETBW116
KUBW117	ATTILA*2/PBW65*2//MURGA/4/MUU #1//PBW343*2/KUKUNA/3/MUU/5/ATTILA*2/PBW65//MURGA	THBW117	Genotype 41	ETBW117
KUBW120	SOKOLL/3/PASTOR//HXL7573/2*BAU/4/PARUS/PASTOR	THBW120	Genotype 42	ETBW120
KUBW121	SOKOLL/3/PASTOR//HXL7573/2*BAU/4/MEX94.2.19//SOKOLL/WBLL1	THBW121	Genotype 43	ETBW121
KUBW122	PUB94.15.1.12/FRTL//92.001E7.32.5/SLVS	THBW122	Genotype 44	ETBW122
KUBW123	SOKOLL/3/PASTOR//HXL7573/2*BAU/4/GLADIUS	THBW123	Genotype 45	ETBW123
KUBW126	SHA7//PRL/VEE#6/3/FASAN/4/HAAS8446/2*FASAN/5/CBRD/KAUZ/6/MILAN/AMSEL/7/FRET2*2/KUKUNA/8/KINGBIRD #1	THBW126	Genotype 46	ETBW126
KUBW127	SOKOLL/3/PASTOR//HXL7573/2*BAU*2/4/PASTOR//MILAN/KAUZ/3/BAV92	THBW127	Genotype 47	ETBW127
KUBW128	WBLL1/KUKUNA//TACUPETO F2001/3/BAJ #1*2/4/KINGBIRD #1	THBW128	Genotype 48	ETBW128
KUBW129	CNO79//PF70354/MUS/3/PASTOR/4/BAV92*2/5/HAR311/6/PBW343*2/KUKUNA*2//FRTL/PIFED/7/CNO79//PF70354/MUS/3/PASTOR/4/BAV92*2/5/HAR311	THBW129	Genotype 49	ETBW129
KUBW130	KFA/2*KACHU*2//QUELEA	THBW130	Genotype 50	ETBW130
KUBW131	KAUZ//MON/CROW?S?/4/SERI.1B//KAUZ/HEVO/3/AMAD	THBW131	Genotype 51	ETBW131
KUBW133	FLORKWA-2/85 Z 1284//ETBW 4920/3/LOULOU-18	THBW133	Genotype 52	ETBW133
KUBW134	KRICHAUFF/2*PASTOR//SHUHA-8/DUCULA	THBW134	Genotype 53	ETBW134
KUBW138	INQALAB 91*2/KUKUNA//PFAU/WEAVER/3/INQALAB 91*2/KUKUNA/4/TRCH/SRTU//KACHU	THBW138	Genotype 54	ETBW138
KUBW139	ATTILA*2/PBW65//PIHA/3/ATTILA/2*PASTOR*2/5/SERI.1B//KAUZ/HEVO/3/AMAD*2/4/KIRITATI	THBW139	Genotype 55	ETBW139
KUBW140	BECARD #1/CIRNO C 2008//BECARD	THBW140	Genotype 56	ETBW140
KUBW141	BAVIS #1/5/W15.92/4/PASTOR//HXL7573/2*BAU/3/WBLL1	THBW141	Genotype 57	ETBW141
KUBW143	SUP152/3/TRCH/SRTU//KACHU	THBW143	Genotype 58	ETBW143
KUBW144	WHEAR/KUKUNA/3/C80.1/3*BATAVIA//2*WBLL1*2/6/WBLL1*2/4/YACO/PBW65/3/KAUZ*2/TRAP//KAUZ/5/KACHU #1	THBW144	Genotype 59	ETBW144
KUBW146	FRANCOLIN #1/3/PBW343*2/KUKUNA*2//YANAC/4/KINGBIRD #1//INQALAB 91*2/TUKURU	THBW146	Genotype 60	ETBW146
KUBW147	W15.92/4/PASTOR//HXL7573/2*BAU/3/WBLL1/8/BOW/VEE/5/ND/VG9144//KAL/BB/3/YACO/4/CHIL/6/CASKOR/3/CROC_1/AE.SQUARROSA (224)//OPATA/7/PASTOR//MILAN/KAUZ/3/BAV92	THBW147	Genotype 61	ETBW147
KUBW148	SOKOLL/3/PASTOR//HXL7573/2*BAU*2/6/OASIS/5*BORL95/5/CNDO/R143//ENTE/MEXI75/3/AE.SQ/4/2*OCI	THBW148	Genotype 62	ETBW148
KUBW149	UP2338*2/4/SNI/TRAP#1/3/KAUZ*2/TRAP//KAUZ/5/MILAN/KAUZ//CHIL/CHUM18/6/UP2338*2/4/SNI/TRAP#1/3/KAUZ*2/TRAP//KAUZ/7/CNO79//PF70354/MUS/3/PASTOR/4/BAV92*2/5/FH6-1-7	THBW149	Genotype 63	ETBW149
KUBW150	SOKOLL/92.001E7.32.5//SOKOLL/EXCALIBUR	THBW150	Genotype 64	ETBW150
KUBW152	KINDE*2/SOLALA//2*MUNAL #1	THBW152	Genotype 65	ETBW152
KUBW153	FRNCLN*2/7/CMH83.1020/HUITES/6/CMH79A.955/4/AGA/3/4*SN64/CNO67//INIA66/5/NAC/8/WBLL1*2/KURUKU//HEILO/9/WBLL1*2/KURUKU//HEILO	THBW153	Genotype 66	ETBW153
KUBW154	VILLA JUAREZ F2009/3/T.DICOCCON PI94625/AE.SQUARROSA (372)//3*PASTOR/4/WBLL1*2/BRAMBLING/5/QUAIU #1/3/T.DICOCCON PI94625/AE.SQUARROSA (372)//3*PASTOR/4/QUAIU #2	THBW154	Genotype 67	ETBW154
KUBW155	WBLL1*2/KURUKU//KRONSTAD F2004/3/WBLL1*2/BRAMBLING/4/KINGBIRD #1//INQALAB 91*2/TUKURU	THBW155	Genotype 68	ETBW155
KUBW156	ATTILA*2/PBW65/6/PVN//CAR422/ANA/5/BOW/CROW//BUC/PVN/3/YR/4/TRAP#1/7/ATTILA/2*PASTOR*2/8/WBLL1/KUKUNA//TACUPETO F2001/3/UP2338*2/VIVITSI	THBW156	Genotype 69	ETBW156
KUBW158	EBW11 TALL#1/WESTONIA-Rht5//SUP152	THBW158	Genotype 70	ETBW158
KUBW160	ND643/2*WAXWING/5/BABAX/LR42//BABAX*2/4/SNI/TRAP#1/3/KAUZ*2/TRAP//KAUZ/6/ND643/2*WAXWING	THBW160	Genotype 71	ETBW160
KUBW167	TC870344/GUI//TEMPORALERA M 87/AGR/3/2*WBLL1/4/2*BAVIS	THBW167	Genotype 72	ETBW167
KUBW168	DOY1/AE.SQUARROSA (447)/5/2*CROC_1/AE.SQUARROSA (205)//BORL95/3/PRL/SARA//TSI/VEE#5/4/FRET2	THBW168	Genotype 73	ETBW168
KUBW169	HAHN/2*WEAVER/4/BOW/CROW//BUC/PVN/3/2*VEE#10/5/CROC_1/AE.SQUARROSA (224)//OPATA/3/KAUZ*2/BOW//KAUZ/4/NL683/6/KINGBIRD #1/7/PBW343*2/KUKUNA//PBW343*2/KUKUNA	THBW169	Genotype 74	ETBW169
KUBW171	KENYA SUNBIRD/3/ND643//2*PRL/2*PASTOR	THBW171	Genotype 75	ETBW171
KUBW176	KISKADEE #1/5/KAUZ*2/MNV//KAUZ/3/MILAN/4/BAV92/6/WHEAR//2*PRL/2*PASTOR	THBW176	Genotype 76	ETBW176
KUBW177		THBW177	Genotype 77	ETBW177
KUBW178		THBW178	Genotype 78	ETBW178
KUBW179		THBW179	Genotype 79	ETBW179
KUBW182		THBW182	Genotype 80	ETBW182
KUBW188		THBW188	Genotype 81	ETBW188
KUBW194		THBW194	Genotype 82	ETBW194
KUBW201		THBW201	Genotype 83	ETBW201
KUBW202		THBW202	Genotype 84	ETBW202
KUBW206	SUP152*2/HAWFINCH #1/3/2*KACHU #1/KIRITATI//KACHU	THBW206	Genotype 85	ETBW206
KUBW207	SUP152*2/MUU*2/6/ROLF07*2/5/REH/HARE//2*BCN/3/CROC_1/AE.SQUARROSA (213)//PGO/4/HUITES	THBW207	Genotype 86	ETBW207
KUBW210	BAJ #1/PAURAQ/3/KACHU #1/KIRITATI//KACHU/4/BAJ #1*2/WHEAR	THBW210	Genotype 87	ETBW210
KUBW212	MUNAL/WESTONIA/6/CNO79//PF70354/MUS/3/PASTOR/4/BAV92*2/5/FH6-1-7/7/MUNAL/WESTONIA	THBW212	Genotype 88	ETBW212
KUBW213	ATTILA/3*BCN//BAV92/3/PASTOR/4/TACUPETO F2001*2/BRAMBLING/5/PAURAQ/6/KACHU #1/KIRITATI//KACHU/7/ATTILA/3*BCN//BAV92/3/PASTOR/4/TACUPETO F2001*2/BRAMBLING/5/PAURAQ	THBW213	Genotype 89	ETBW213
KUBW215	BL3503*2//KANCHAN*2/JUCHI	THBW215	Genotype 90	ETBW215
KUBW222	SERI.1B*2/3/KAUZ*2/BOW//KAUZ/4/SHIHAB-7	THBW222	Genotype 91	ETBW222
KUBW224	KACHU/SAUAL*2/3/TACUPETO F2001/BRAMBLING//KIRITATI	THBW224	Genotype 92	ETBW224
KUBW225	KACHU/SAUAL/4/VARIS/MISR 2/3/FRET2/KUKUNA//FRET2/5/KACHU/SAUAL	THBW225	Genotype 93	ETBW225
KUBW226	FRET2*2/SHAMA//PARUS/3/FRET2*2/KUKUNA*2/4/TRCH/SRTU//KACHU	THBW226	Genotype 94	ETBW226
KUBW227	BECARD #1/4/SOKOLL/3/PASTOR//HXL7573/2*BAU	THBW227	Genotype 95	ETBW227
KUBW228	SOKOLL/WESTONIA	THBW228	Genotype 96	ETBW228
KUBW229	VENDA	THBW229	Genotype 97	ETBW229
KUBW232	FRANCOLIN #1/BLOUK #1/3/KINGBIRD #1//INQALAB 91*2/TUKURU/4/FRANCOLIN #1/BLOUK #1	THBW232	Genotype 98	ETBW232
KUBW233	HUBARA-1/5/CHEN/AEGILOPS SQUARROSA (TAUS)//BCN/3/VEE#7/BOW/4/PASTOR	THBW233	Genotype 99	ETBW233
KUBW234	CHAM-4/MUBASHIIR-9	THBW234	Genotype 100	ETBW234
KUBW237	SERI 82/SHUHA'S'//GRU90-204782/3/MUNIA/CHTO//MILAN	THBW237	Genotype 101	ETBW237
KUBW242	NELOKI/5/FRET2/KUKUNA//FRET2/3/TNMU/4/FRET2*2/SHAMA/6/KINGBIRD #1//INQALAB 91*2/TUKURU	THBW242	Genotype 102	ETBW242
KUBW252	KFA/2*KACHU/4/WBLL1*2/KURUKU//KRONSTAD F2004/3/WBLL1*2/BRAMBLING	THBW252	Genotype 103	ETBW252
KUBW256	FRANCOLIN #1/BLOUK #1*2/3/SAUAL/YANAC//SAUAL	THBW256	Genotype 104	ETBW256
KUBW258	KACHU//WBLL1*2/BRAMBLING*2/3/KACHU/KIRITATI	THBW258	Genotype 105	ETBW258
KUBW262	P1.861/RDWG/4/KAUZ//ALTAR 84/AOS/3/KAUZ	THBW262	Genotype 106	ETBW262
KUBW263	KAUZ//MON/CROW?S?/3/VEE/PJN//2*KAUZ	THBW263	Genotype 107	ETBW263
KUBW265	KAUZ//MON/CROW?S?/4/SERI.1B//KAUZ/HEVO/3/AMAD	THBW265	Genotype 108	ETBW265
KUBW266	SERI.1B//KAUZ/HEVO/3/AMAD/4/PFAU/MILAN	THBW266	Genotype 109	ETBW266
KUBW267	SERI.1B*2/3/KAUZ*2/BOW//KAUZ/4/TEVEE'S'/BOBWHITE #1	THBW267	Genotype 110	ETBW267
KUBW271	ATTILA*2/PBW65/6/PVN//CAR422/ANA/5/BOW/CROW//BUC/PVN/3/YR/4/TRAP#1/7/ATTILA/2*PASTOR*2/8/TRAP#1/BOW/3/VEE/PJN//2*TUI/4/BAV92/RAYON/5/KACHU #1	THBW271	Genotype 111	ETBW271
KUBW272	ATTILA/3*BCN//BAV92/3/TILHI/5/BAV92/3/PRL/SARA//TSI/VEE#5/4/CROC_1/AE.SQUARROSA (224)//2*OPATA*2/6/HUW234+LR34/PRINIA//UP2338*2/VIVITSI	THBW272	Genotype 112	ETBW272
KUBW273	ATTILA/3/URES/PRL//BAV92/4/WBLL1/5/2*SOKOLL/3/PASTOR//HXL7573/2*BAU	THBW273	Genotype 113	ETBW273
KUBW274	BAVIS #1/5/W15.92/4/PASTOR//HXL7573/2*BAU/3/WBLL1	THBW274	Genotype 114	ETBW274
KUBW276	C80.1/3*BATAVIA//2*WBLL1/3/PBW343*2/KUKUNA*2/8/SHA7//PRL/VEE#6/3/FASAN/4/HAAS8446/2*FASAN/5/CBRD/KAUZ/6/MILAN/AMSEL/7/FRET2*2/KUKUNA	THBW276	Genotype 115	ETBW276
KUBW279	CROC_1/AE.SQUARROSA (205)//BORL95/3/PRL/SARA//TSI/VEE#5/4/FRET2/5/SNI/TRAP#1/3/KAUZ*2/TRAP//KAUZ/4/PARUS/PASTOR	THBW279	Genotype 116	ETBW279
KUBW285	LIVINGSTON/5/2*W15.92/4/PASTOR//HXL7573/2*BAU/3/WBLL1	THBW285	Genotype 117	ETBW285
KUBW287	KACHU//WBLL1*2/BRAMBLING*2/3/KACHU/KIRITATI	THBW287	Genotype 118	ETBW287
KUBW288	BABAX/LR42//BABAX*2/3/KUKUNA/4/CROSBILL #1/5/BECARD*2/6/KACHU/KIRITATI	THBW288	Genotype 119	ETBW288
KUBW290	MEX94.27.1.20/3/SOKOLL//ATTILA/3*BCN*2/6/OASIS/5*BORL95/5/CNDO/R143//ENTE/MEXI75/3/AE.SQ/4/2*OCI	THBW290	Genotype 120	ETBW290
KUBW291	PASTOR//HXL7573/2*BAU/3/SOKOLL/WBLL1/4/OR 9437534/SOKOLL//SOKOLL	THBW291	Genotype 121	ETBW291
KUBW293	PASTOR//HXL7573/2*BAU/3/SOKOLL/WBLL1/6/OASIS/5*BORL95/5/CNDO/R143//ENTE/MEXI75/3/AE.SQ/4/2*OCI/7/W15.92/4/PASTOR//HXL7573/2*BAU/3/WBLL1	THBW293	Genotype 122	ETBW293
KUBW294	PASTOR//HXL7573/2*BAU/3/WBLL1/4/SOKOLL/3/PASTOR//HXL7573/2*BAU	THBW294	Genotype 123	ETBW294
KUBW295	PRL/2*PASTOR*2/5/CROC_1/AE.SQUARROSA (205)//BORL95/3/PRL/SARA//TSI/VEE#5/4/FRET2	THBW295	Genotype 124	ETBW295
KUBW301	SOKOLL/WBLL1/4/2*SOKOLL/3/PASTOR//HXL7573/2*BAU	THBW301	Genotype 125	ETBW301
KUBW304	TUKURU//BAV92/RAYON/6/NG8201/KAUZ/4/SHA7//PRL/VEE#6/3/FASAN/5/MILAN/KAUZ/7/SERI.1B//KAUZ/HEVO/3/AMAD*2/4/KIRITATI/8/ATTILA*2/PBW65*2//W485/HD29	THBW304	Genotype 126	ETBW304
KUBW307	WHEAR/KUKUNA/3/C80.1/3*BATAVIA//2*WBLL1*2/6/WBLL1*2/4/YACO/PBW65/3/KAUZ*2/TRAP//KAUZ/5/KACHU #1	THBW307	Genotype 127	ETBW307
KUBW309	ATTILA*2/PBW65/6/PVN//CAR422/ANA/5/BOW/CROW//BUC/PVN/3/YR/4/TRAP#1/7/ATTILA/2*PASTOR/8/CNO79//PF70354/MUS/3/PASTOR/4/BAV92*2/5/HAR311	THBW309	Genotype 128	ETBW309
KUBW312	KSW/SAUAL//SAUAL/3/KFA/2*KACHU	THBW312	Genotype 129	ETBW312
KUBW319	FRET2*2/BRAMBLING/3/FRET2/WBLL1//TACUPETO F2001/4/WBLL1*2/BRAMBLING/5/WBLL1*2/TUKURU//CROSBILL #1	THBW319	Genotype 130	ETBW319
KUBW330	TUKURU//BAV92/RAYON/3/FRNCLN/4/2*ATTILA*2/PBW65//MURGA	THBW330	Genotype 131	ETBW330
KUBW333	BECARD/FRNCLN//KANCHAN*2/JUCHI/3/BECARD/FRNCLN	THBW333	Genotype 132	ETBW333
KUBW336	WBLL1*2/BRAMBLING//VORB/FISCAL/3/BECARD/4/MUTUS*2/AKURI/5/MUTUS*2/AKURI	THBW336	Genotype 133	ETBW336
KUBW343	KUTZ//KFA/2*KACHU	THBW343	Genotype 134	ETBW343
KUBW221	Meraro/HA304	THBW221	Genotype 135	ETBW221
KUBW219	KBG 01/ETBW5483	THBW219	Genotype 136	ETBW219
KUBW217	ETBW 6037/GALIL	THBW217	Genotype 137	ETBW217
KUBW251	BONSU	THBW251	Genotype 138	ETBW251
KUBW324	FRET2*2/4/SNI/TRAP#1/3/KAUZ*2/TRAP//KAUZ*2/5/BOW/URES//2*WEAVER/3/CROC_1/AE.SQUARROSA (213)//PGO/6/KFA/2*KACHU/7/FRET2*2/4/SNI/TRAP#1/3/KAUZ*2/TRAP//KAUZ/5/KACHU	THBW324	Genotype 139	ETBW324
KUBW325	PFAU/WEAVER*2/4/BOW/NKT//CBRD/3/CBRD/5/ATTILA*2/PBW65*2/4/BOW/NKT//CBRD/3/CBRD/6/FRNCLN/BECARD	THBW325	Genotype 140	ETBW325
KUBW326	PFAU/WEAVER*2/4/BOW/NKT//CBRD/3/CBRD/5/ATTILA*2/PBW65*2/4/BOW/NKT//CBRD/3/CBRD/6/FRNCLN/BECARD	THBW326	Genotype 141	ETBW326
KUBW327	WBLL1*2/CHAPIO//HAWFINCH #1/3/2*WBLL1*2/TUKURU//CROSBILL #1	THBW327	Genotype 142	ETBW327
KUBW328	WBLL1*2/CHAPIO//HAWFINCH #1/3/2*WBLL1*2/TUKURU//CROSBILL #1	THBW328	Genotype 143	ETBW328
KUBW329	TUKURU//BAV92/RAYON/3/FRNCLN/4/2*ATTILA*2/PBW65//MURGA	THBW329	Genotype 144	ETBW329
KUBW339	WAXWING//INQALAB 91*2/KUKUNA/3/WBLL1*2/TUKURU/8/2*NG8201/KAUZ/4/SHA7//PRL/VEE#6/3/FASAN/5/MILAN/KAUZ/6/ACHYUTA/7/PBW343*2/KUKUNA	THBW339	Genotype 145	ETBW339
KUBW340	BCN/RIALTO//2*MUNAL #1	THBW340	Genotype 146	ETBW340
KUBW341	MUTUS*2/KINGBIRD #1/3/KSW/SAUAL//SAUAL	THBW341	Genotype 147	ETBW341
KUBW342	ATTILA/3*BCN//BAV92/3/PASTOR/4/TACUPETO F2001*2/BRAMBLING/5/PAURAQ/6/KFA/2*KACHU	THBW342	Genotype 148	ETBW342
KUBW415	danda a	THBW415	Genotype 149	ETBW415
KUBW365	Alidoro	THBW365	Genotype 150	ETBW365
KUBW366	Medawolabu	THBW366	Genotype 151	ETBW366
KUBW405	PVT	THBW405	Genotype 152	ETBW405
KUBW406	NVT2	THBW406	Genotype 153	ETBW406
KUBW407	Adap	THBW407	Genotype 154	ETBW407
