# Supplementary material for: Genome-Wide Association Analysis of Salinity Tolerance-related Loci in Bread Wheat (Triticum aestivum L.) at the Germination Stage
Source: Research Square preprint supplement (doi:10.21203/rs.3.rs-8681970/v1), 2026-02-02
Supplement: Supplementary file 7 [file d290a3e9db209ca5d28b8a00.xlsx]

## Sheet: Sheet1
Supplementary Table S2. Salt tolerance classification of genotypes under treatments based on SI values
Genotypes	Trt	SI	Tolerance	Genotypes	Trt	SI	Tolerance		Genotypes	Trt	SI	Tolerance
ETBW219	200	1	Tolerant	ETBW014	200	0.7	Moderate			200	0.1	Sensitive
									ETBW001
ETBW067	200	0.8	Tolerant	ETBW020	200	0.7	Moderate			200	0.2	Sensitive
									ETBW015
ETBW267	200	0.8	Tolerant	ETBW037	200	0.6	Moderate			200	0.5	Sensitive
									ETBW035
				ETBW217	200	0.6	Moderate			200	0.3	Sensitive
									ETBW051
				ETBW108	200	0.6	Moderate			200	0.5	Sensitive
									ETBW058
				ETBW126	200	0.7	Moderate			200	0.3	Sensitive
									ETBW059
				ETBW129	200	0.6	Moderate			200	0.2	Sensitive
									ETBW060
				ETBW134	200	0.7	Moderate			200	0	Sensitive
									ETBW074
				ETBW143	200	0.6	Moderate			200	0.5	Sensitive
									ETBW082
				ETBW153	200	0.6	Moderate		ETBW086	200	0.3	Sensitive
	Legend: Trt =treatment, SI= Salinity index
